# Supplementary material for: Highly stable halide perovskites for photocatalysis via multi-dimensional structure design and in situ phase transition
Source: Royal Society of Chemistry journal article supplement (doi:10.1039/d2dt01639g), 2022-01-01
Supplement: d2dt01639g1.pdf [file d2dt01639g1.pdf]

## Supporting Information

### Highly Stable Halide Perovskites for Photocatalysis via Multi-dimensional Structure Design and In-situ Phase Transition<sup>†</sup>

Yiqin Gong,<sup>a‡</sup> Fan Ye,<sup>b‡</sup> Qiliang Zhu,<sup>a</sup> Wei Yan,<sup>a</sup> Jianhua Shen,<sup>\*a</sup> Kan-Hao Xue,<sup>\*b</sup> Yihua Zhu,<sup>\*a</sup> Chunzhong Li<sup>a</sup>

<sup>a</sup> Shanghai Engineering Research Centre of Hierarchical Nanomaterials, Key Laboratory for Ultrafine Materials of Ministry of Education, School of Materials Science and Engineering, East China University of Science and Technology, Shanghai 200237, China.

<sup>b</sup> School of Optical and Electronic Information, Wuhan National Laboratory for Optoelectronics, Huazhong University of Science and Technology, Wuhan 430074, China.

E-mail: jianhuashen@ecust.edu.cn; xkh@hust.edu.cn; yhzhu@ecust.edu.cn.

<sup>‡</sup> *These authors contributed equally to this work.*

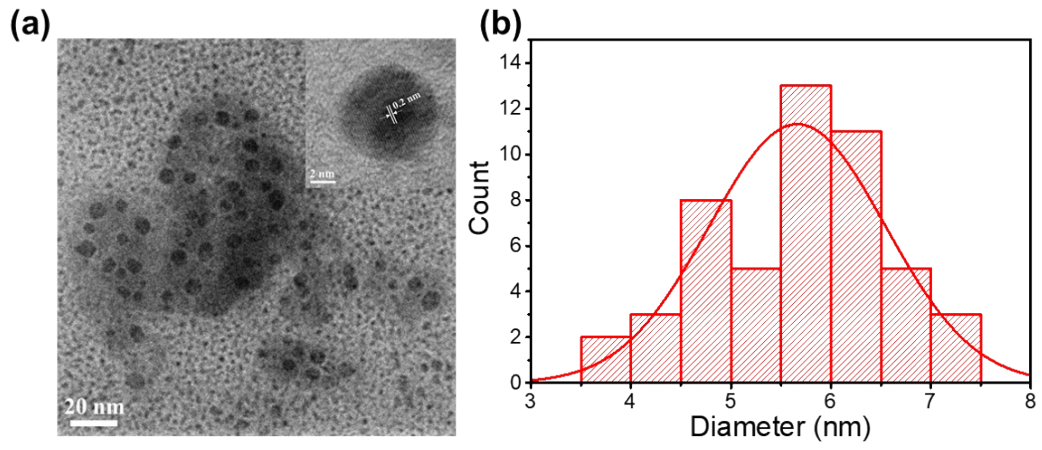

**Fig. S1** (a) TEM image of CsPbBr<sub>3</sub> QDs. (b) Size distribution of CsPbBr<sub>3</sub> QDs.

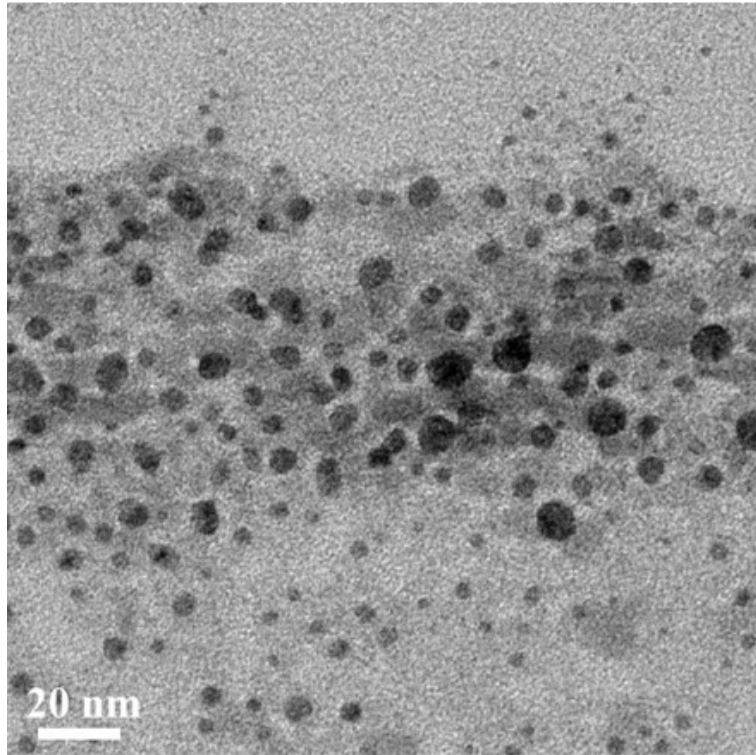

**Fig. S2** TEM image of 0.1 PEABr sample.

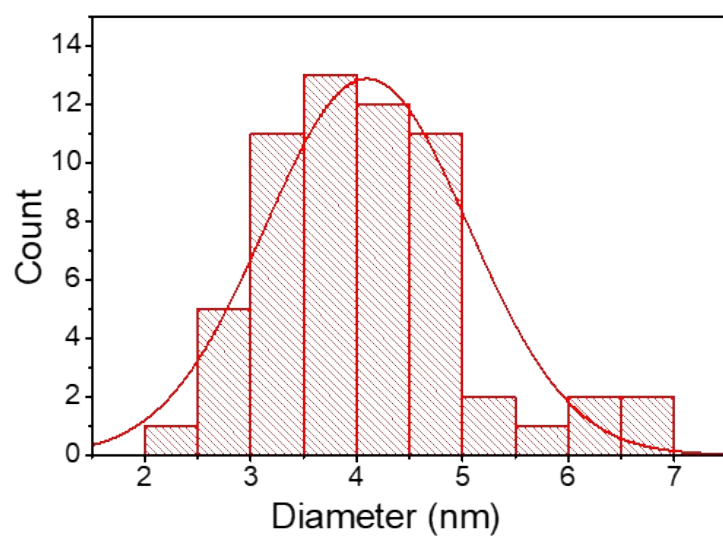

**Fig. S3** Size distribution of 0.3 PEABr sample.

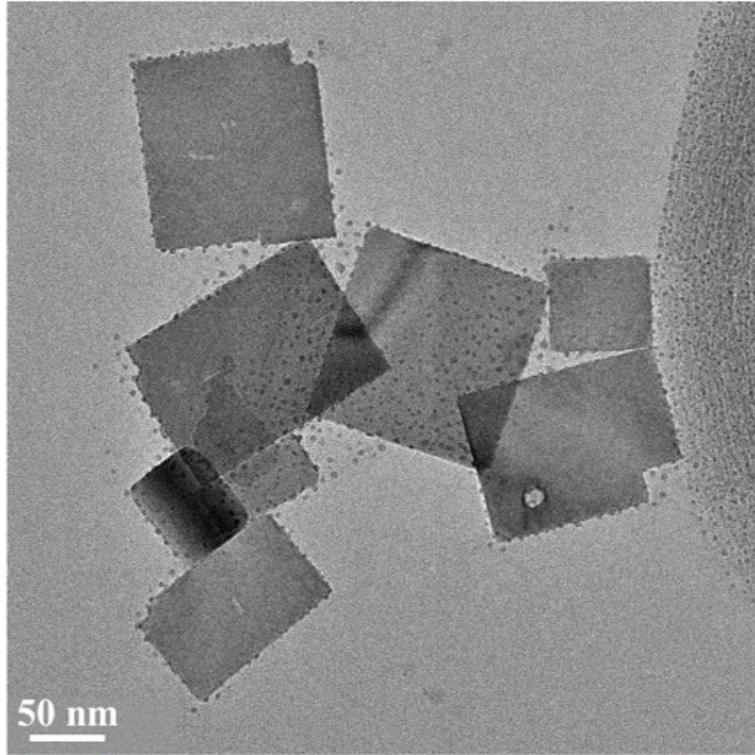

**Fig. S4** TEM image of 0.5 PEABr sample.

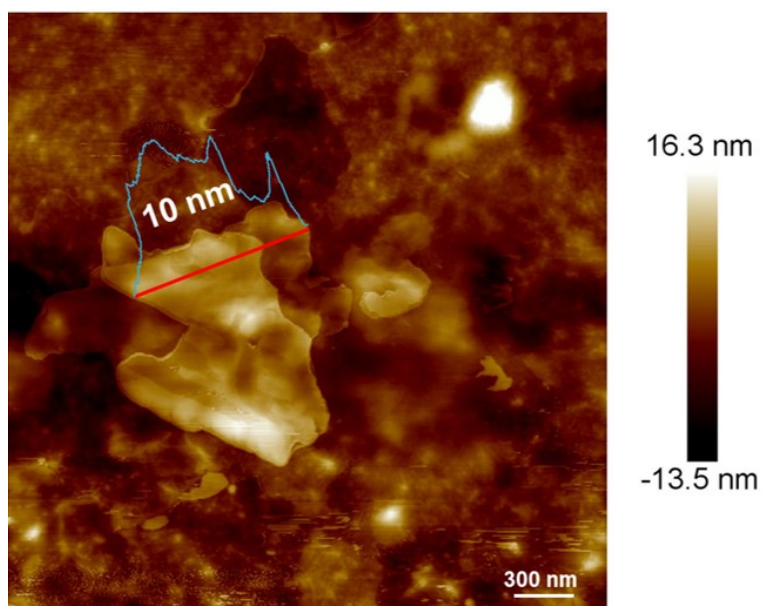

**Fig. S5** AFM images of 0.5 PEABr sample.

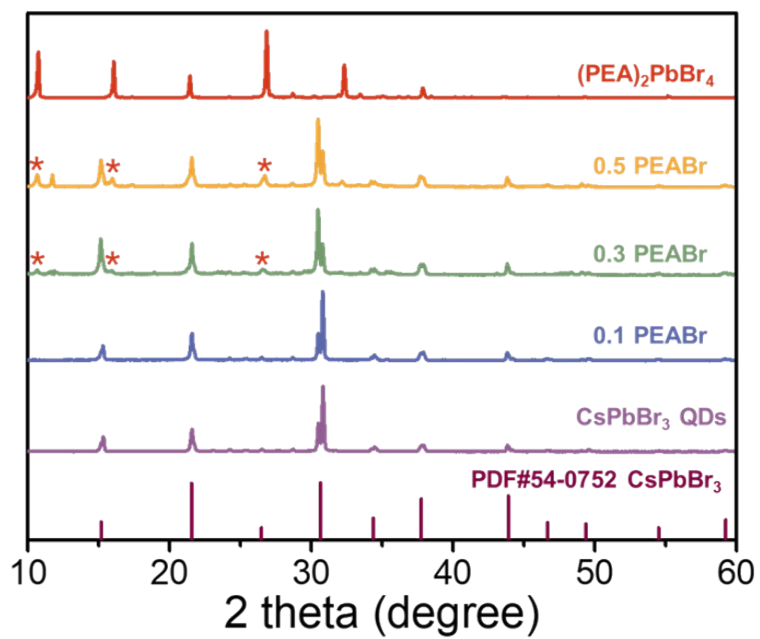

**Fig. S6** XRD pattern of CsPbBr<sub>3</sub> QDs, 0.1 PEABr sample, 0.3 PEABr sample, 0.5 PEABr sample, 2D (PEA)<sub>2</sub>PbBr<sub>4</sub> sample.

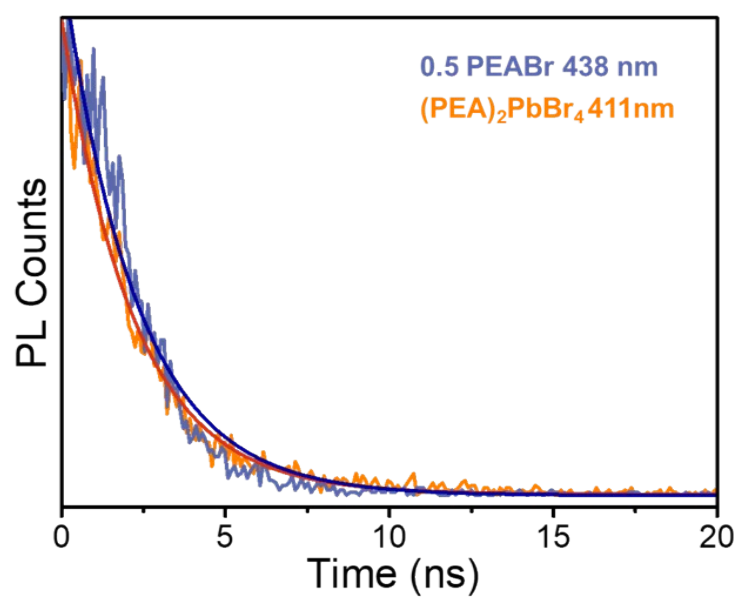

**Fig. S7** Time-resolved PL spectra of 0.5 PEABr sample and 2D (PEA)<sub>2</sub>PbBr<sub>4</sub> sample.



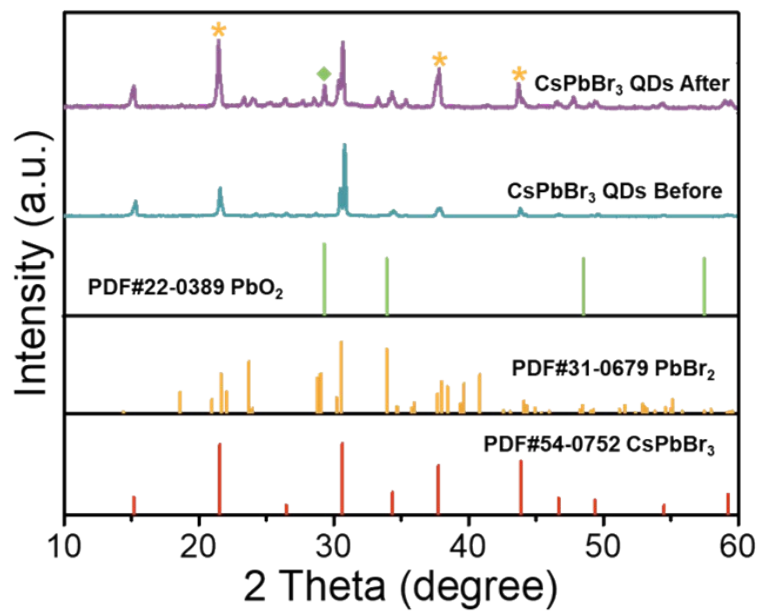

**Fig. S8** XRD patterns of CsPbBr<sub>3</sub> QDs sample before and after photocatalytic reaction.

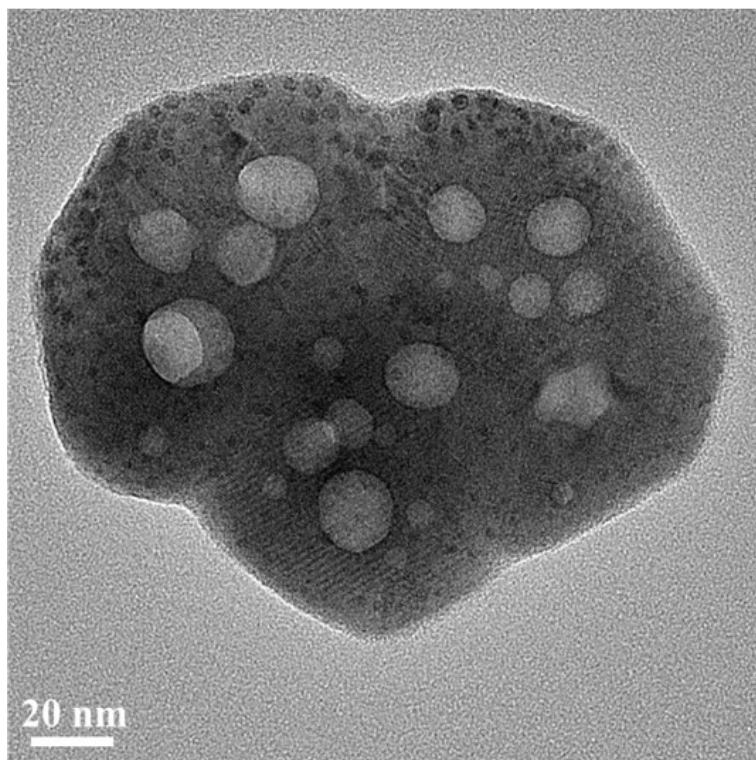

**Fig. S9** TEM image of CsPbBr<sub>3</sub> QDs sample after reaction.

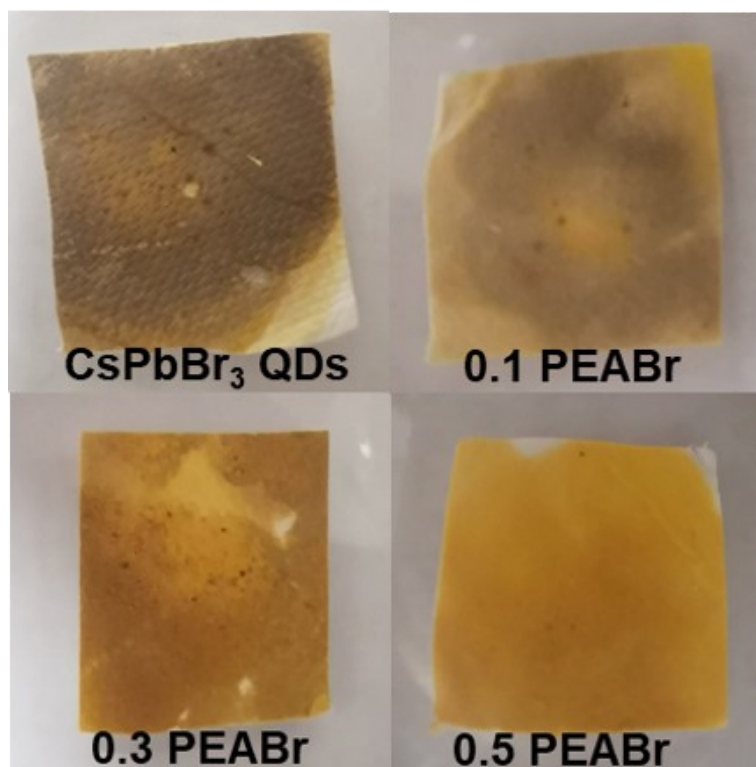

**Fig. S10** Optical photographs of samples after photocatalytic reaction.

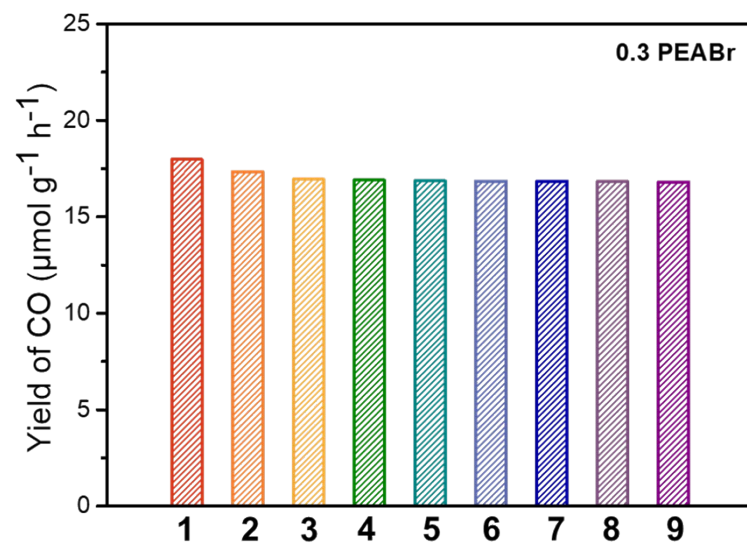

**Fig. S11** Yield of CO after 3 h photochemical reaction of 0.3 PEABr sample as photocatalysts after 9 cycles.

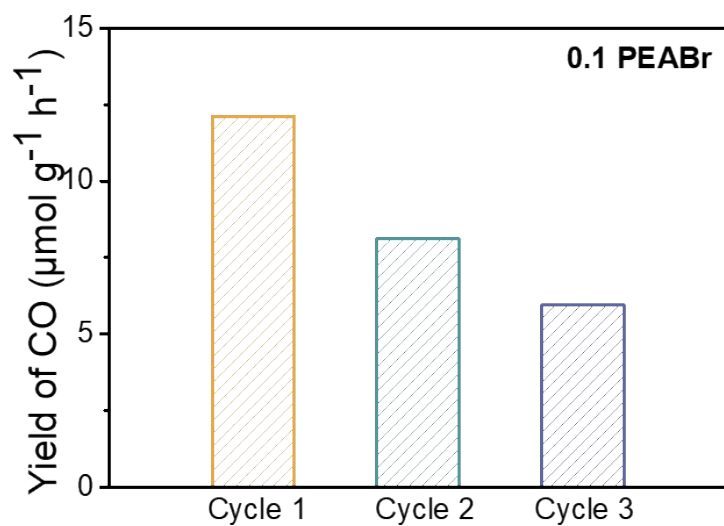

**Fig. S12** Yield of the CO after 3 h photochemical reaction of 0.1 PEABr sample as photocatalysts after 3 cycles.

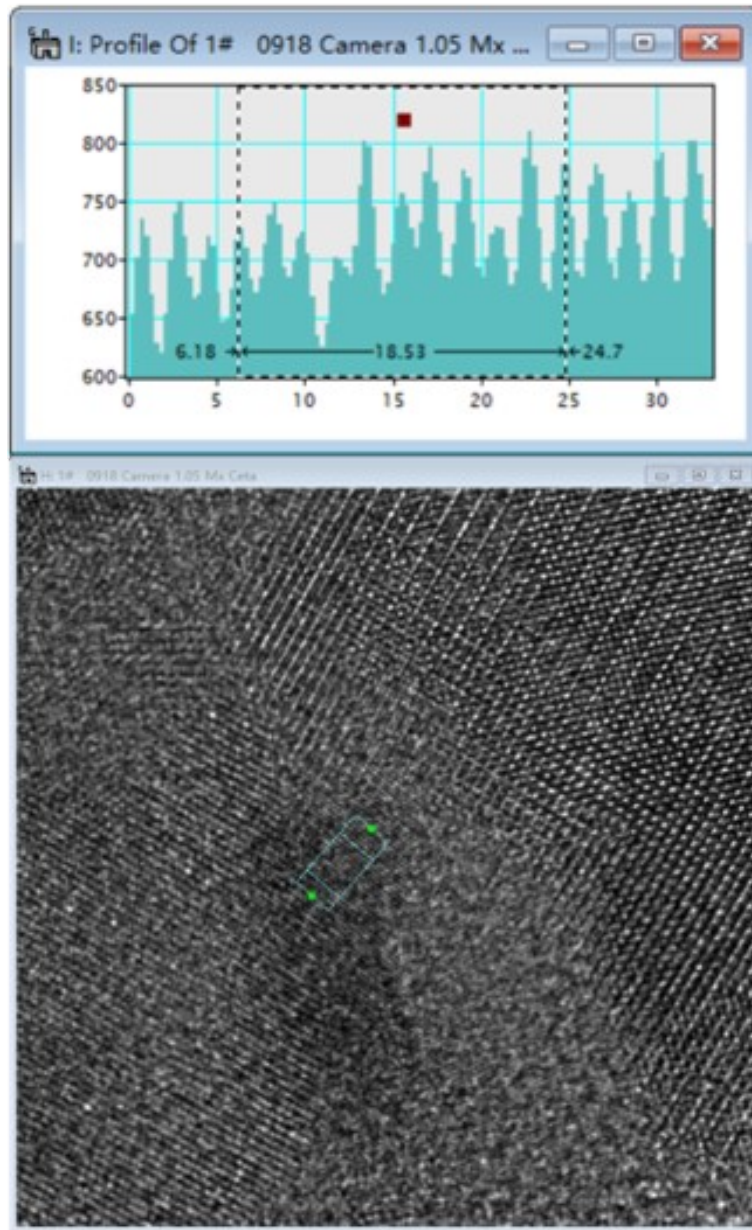

Fig. S13 Partly enlarged area of Figure 4a (marked with yellow).

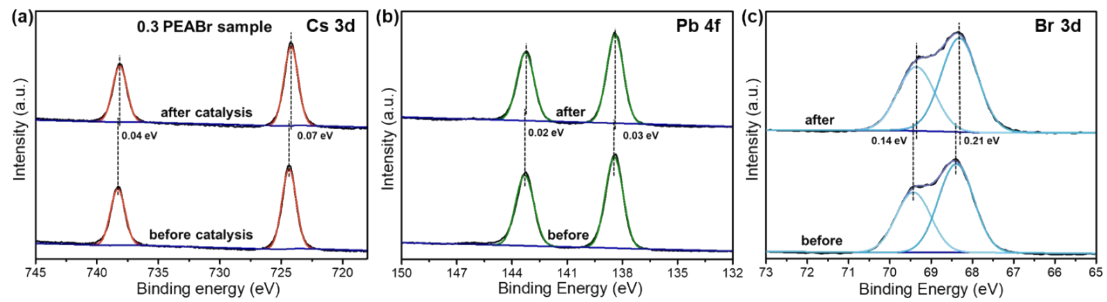

**Fig. S14** High-resolution XPS spectra of Cs 3d, Pb 4f and Br 3d of 0.3 PEABr sample before and after catalysis.

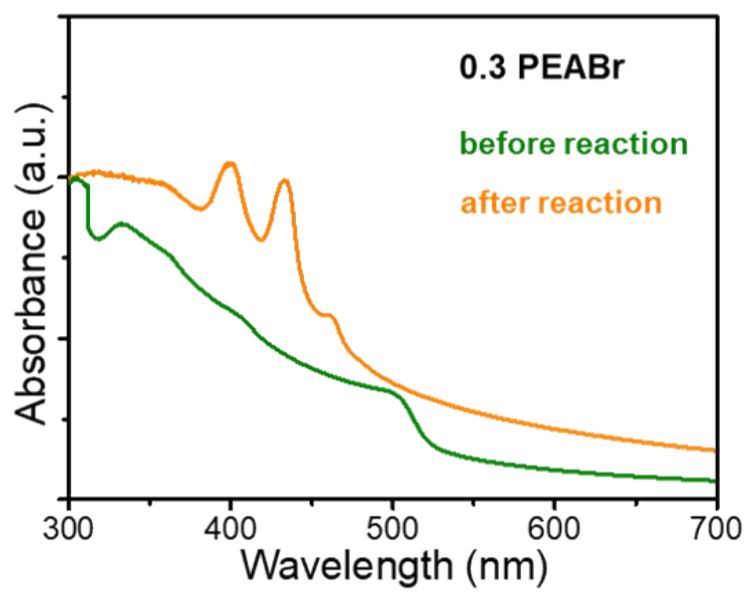

**Fig. S15** Absorbance spectra of 0.3 PEABr sample before and after reaction.



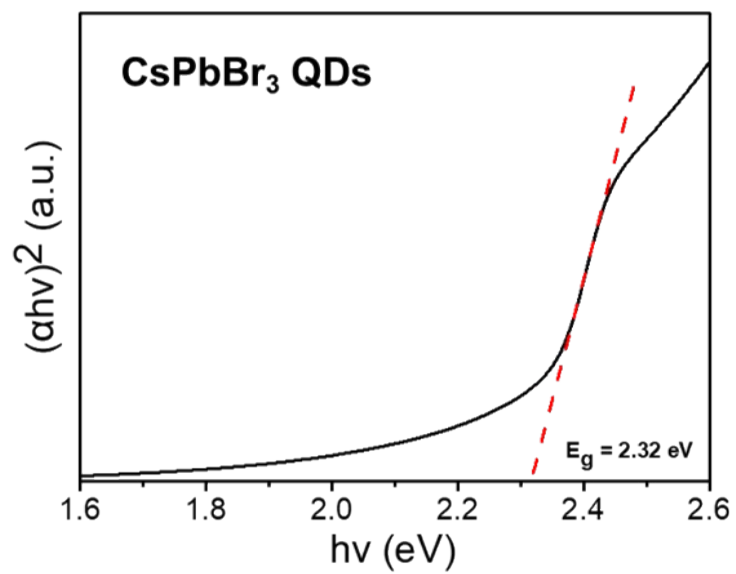

**Fig. S16** Tauc plots of CsPbBr<sub>3</sub> QDs sample.

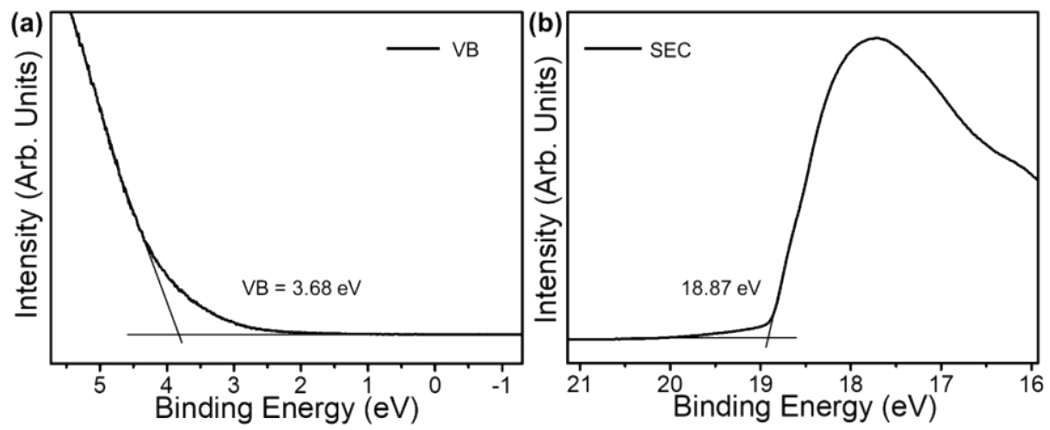

**Fig. S17** UPS spectra of CsPbBr<sub>3</sub> QDs. (a) shows valence band maximum. (b) shows the spectra close to the Fermi edge.

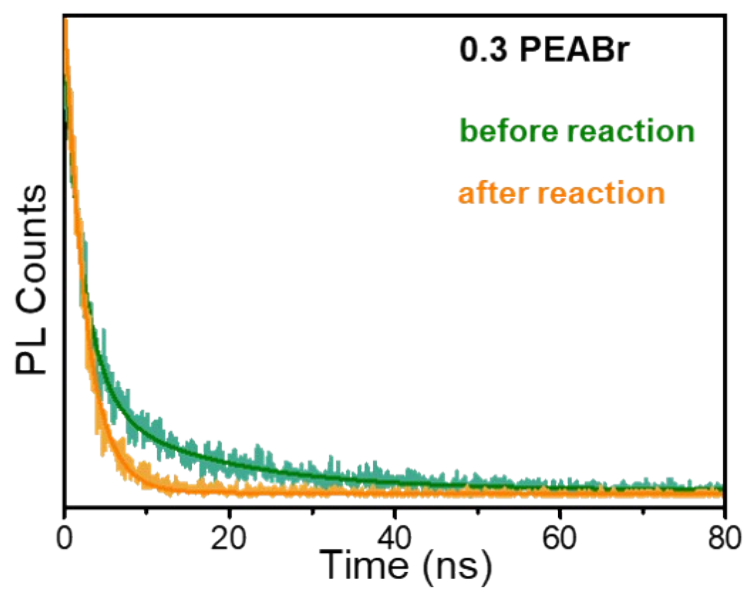

**Fig. S18** Time-resolved PL spectra of 0.3 PEABr sample before and after reaction.

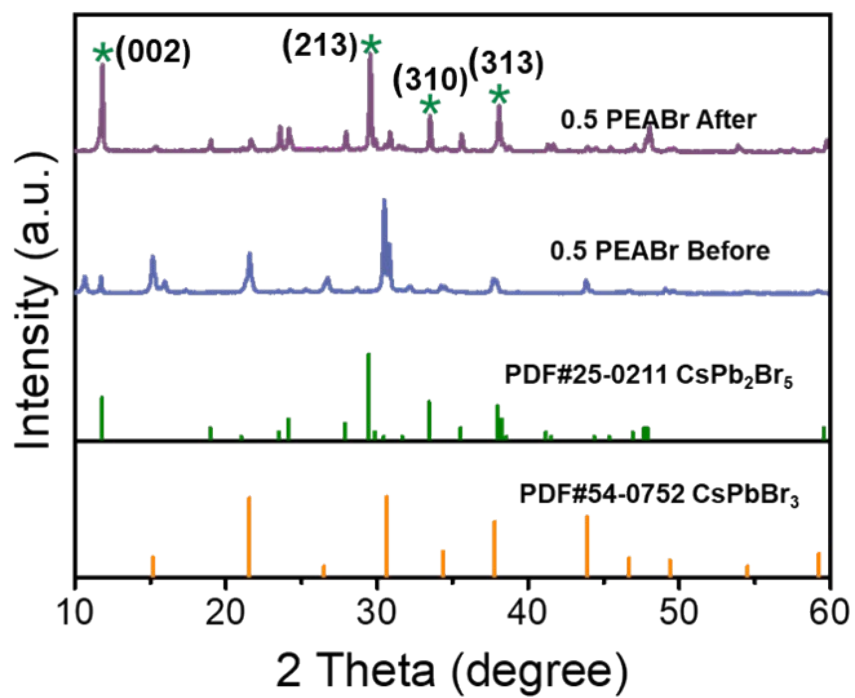

Fig. S19 XRD patterns of 0.5 PEABr sample before and after photocatalytic reaction.

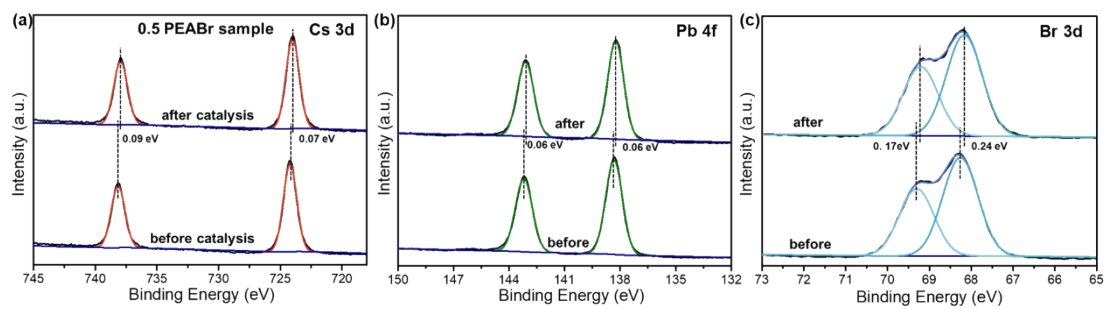

**Fig. S20** High-resolution XPS spectra of Cs 3d, Pb 4f and Br 3d of 0.5 PEABr sample before and after catalysis.

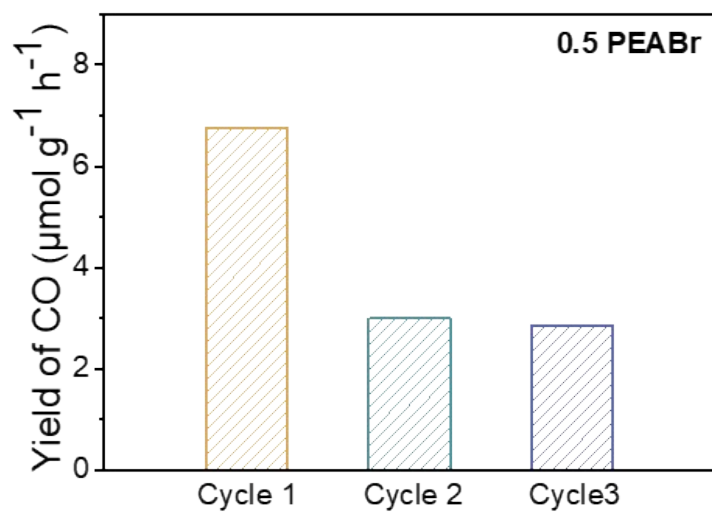

**Fig. S21** Yield of the CO after 3 h photochemical reaction of 0.5 PEABr sample as photocatalysts after 3 cycles.

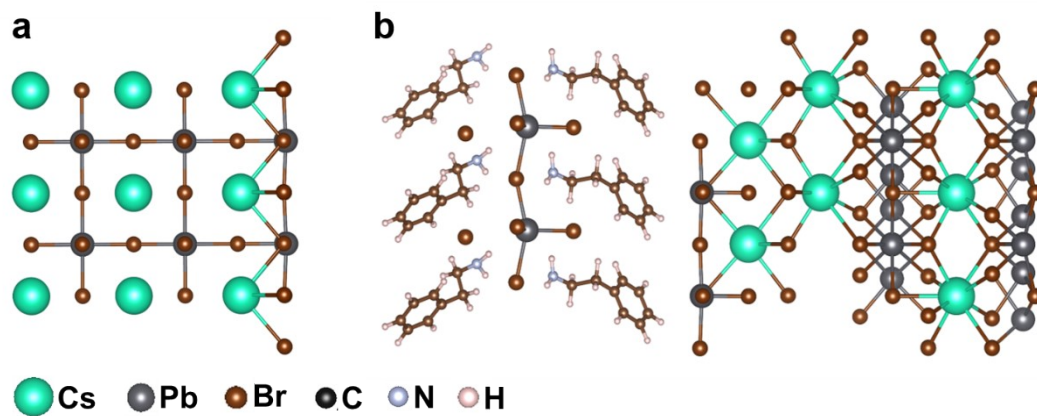

**Fig. S22** Schematic structure of (a) CsPbBr<sub>3</sub> QDs and (b) (PEA)<sub>2</sub>PbBr<sub>4</sub> NSs/CsPbBr<sub>3</sub> QDs/CsPb<sub>2</sub>Br<sub>5</sub> NSs.

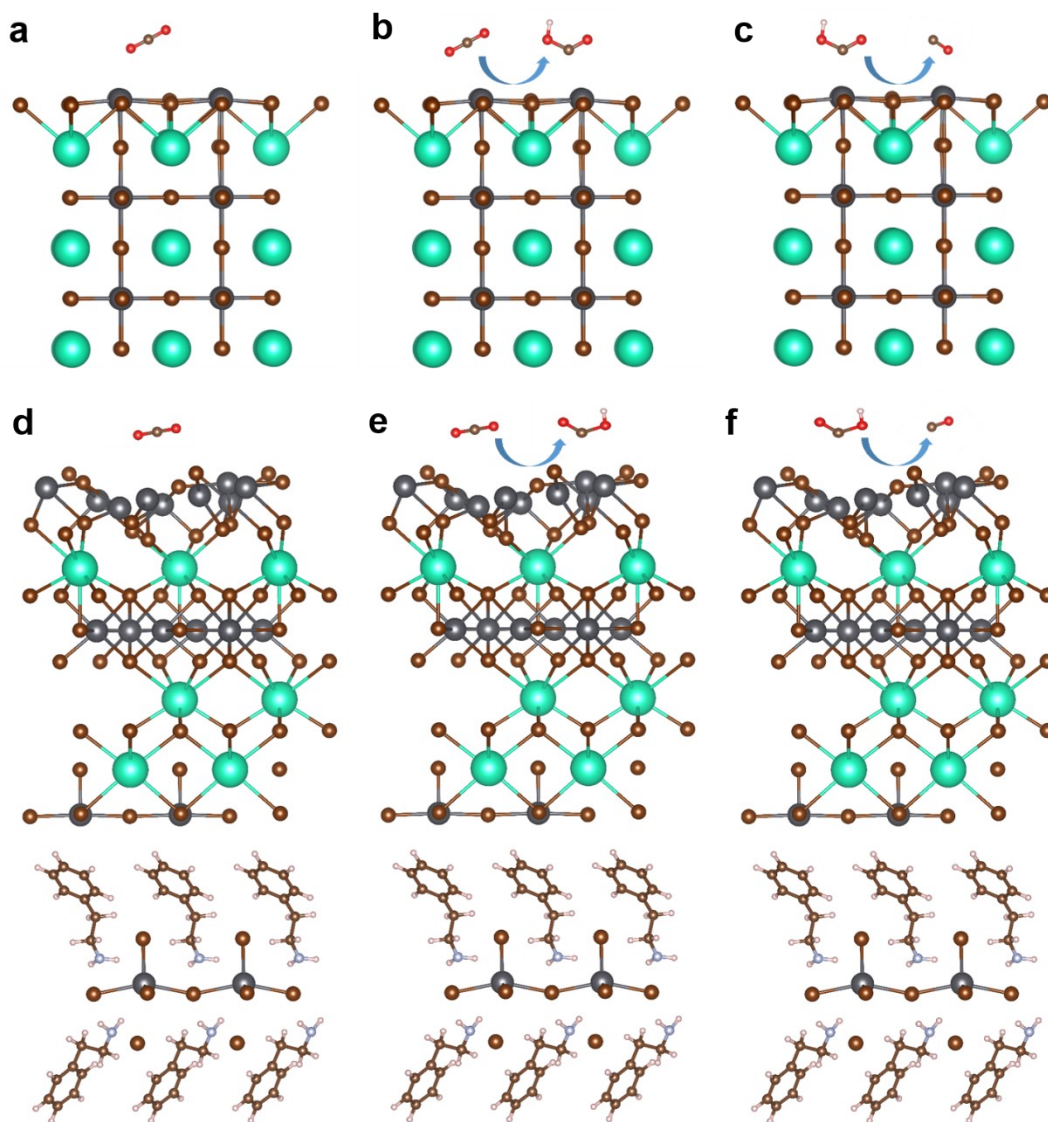

**Fig. S23** Simulated process of  $\text{CO}_2$  adsorbed on (a)  $\text{CsPbBr}_3$  QDs and (d)  $(\text{PEA})_2\text{PbBr}_4$  NSs/ $\text{CsPbBr}_3$  QDs/ $\text{CsPb}_2\text{Br}_5$  NSs. (b, e) The conversion process of  $\text{CO}_2$  to  $^*\text{COOH}$ . (c, f) The conversion process of  $^*\text{COOH}$  to  $^*\text{CO}$ .



**Table S1** Fitted data by biexponential decay kinetics of PL decay curves

| Sample                               | $\tau_1$ (ns) | $A_1$ (%) | $\tau_2$ (ns) | $A_2$ (%) | $\tau_{\text{average}}$ (ns) |
|--------------------------------------|---------------|-----------|---------------|-----------|------------------------------|
| CsPbBr <sub>3</sub> QDs              | 5.22          | 28.09     | 27.52         | 71.91     | 21.26                        |
| 0.1 PEABr                            | 5.04          | 28.26     | 25.23         | 71.74     | 19.60                        |
| 0.3 PEABr                            | 3.63          | 37.35     | 13.03         | 62.65     | 9.52                         |
| 0.3 PEABr (505 nm) after reaction    | 2.36          | 88.57     | 17.01         | 11.43     | 4.03                         |
| 0.5 PEABr (508 nm)                   | 2.48          | 36.84     | 15.99         | 63.16     | 11.01                        |
| 0.5 PEABr (438 nm)                   | 1.80          | 96.59     | 11.80         | 3.41      | 2.14                         |
| 0.5 PEABr (483 nm) after reaction    | 1.53          | 77.93     | 10.22         | 22.07     | 3.45                         |
| (PEA) <sub>2</sub> PbBr <sub>4</sub> | 2.01          | 92.57     | 10.48         | 7.43      | 2.64                         |

**Table S2** Composition analysis of 0.3 PEABr and 0.5 PEABr sample before and after photocatalysis based on XPS spectra.

| <b>0.3 PEABr before catalysis</b> | Peak Area | ASF  | Area/ASF | Pb:Cs       | Br:Pb       |
|-----------------------------------|-----------|------|----------|-------------|-------------|
| Cs 3d                             | 87718.82  | 7.2  | 12183.17 |             |             |
| Pb 4f                             | 88157.39  | 6.7  | 13157.82 | <b>1.08</b> | <b>3.14</b> |
| Br 3d                             | 34291.91  | 0.83 | 41315.56 |             |             |
| <b>0.3 PEABr after catalysis</b>  | Peak Area | ASF  | Area/ASF | Pb:Cs       | Br:Pb       |
| Cs 3d                             | 39046.68  | 7.2  | 5423.15  |             |             |
| Pb 4f                             | 53103.53  | 6.7  | 7375.49  | <b>1.36</b> | <b>2.89</b> |
| Br 3d                             | 17691.58  | 0.83 | 21315.16 |             |             |
| <b>0.3 PEABr before catalysis</b> | Peak Area | ASF  | Area/ASF | Pb:Cs       | Br:Pb       |
| Cs 3d                             | 61679.23  | 7.2  | 8566.56  |             |             |
| Pb 4f                             | 64283.42  | 6.7  | 9594.54  | <b>1.12</b> | <b>3.21</b> |
| Br 3d                             | 25562.76  | 0.83 | 30798.50 |             |             |
| <b>0.3 PEABr before catalysis</b> | Peak Area | ASF  | Area/ASF | Pb:Cs       | Br:Pb       |
| Cs 3d                             | 13362.55  | 7.2  | 1855.91  |             |             |
| Pb 4f                             | 23501.46  | 6.7  | 3507.68  | <b>1.89</b> | <b>2.65</b> |
| Br 3d                             | 7715.13   | 0.83 | 9295.34  |             |             |

ASF: Atomic sensitivity factor

**Table S3** Summary of relevant works on CsPbBr<sub>3</sub> QDs as photocatalysts for CO<sub>2</sub> reduction

| Catalyst                                                          | Light                                     | Condition              | Product                              | R <sub>electron</sub><br>( $\mu\text{molg}^{-1}\text{h}^{-1}$ ) | Refs      |
|-------------------------------------------------------------------|-------------------------------------------|------------------------|--------------------------------------|-----------------------------------------------------------------|-----------|
| 0.3 PEABr                                                         | 150 mW cm <sup>-2</sup><br>AM 1.5G filter | H <sub>2</sub> O Vapor | CO                                   | 30.0                                                            | This work |
| CsPbBr <sub>3</sub> @ZIF                                          | 150 mW cm <sup>-2</sup><br>AM 1.5G filter | H <sub>2</sub> O Vapor | CO, CH <sub>4</sub>                  | 29.6                                                            | S1        |
| $\alpha$ -Fe <sub>2</sub> O <sub>3</sub> /RGO/CsPbBr <sub>3</sub> | 150 mW cm <sup>-2</sup><br>AM 1.5G filter | H <sub>2</sub> O Vapor | CO, CH <sub>4</sub> , H <sub>2</sub> | 81.0                                                            | S2        |
| CsPbBr <sub>3</sub> QDs/PbS                                       | 150 mW cm <sup>-2</sup><br>AM 1.5G filter | Ethyl acetate/water    | CO, CH <sub>4</sub>                  | 33.58                                                           | S3        |
| CsPbBr <sub>3</sub> NC/Pd NS                                      | 150 mW cm <sup>-2</sup><br>>420 nm        | H <sub>2</sub> O Vapor | CO, CH <sub>4</sub> , H <sub>2</sub> | 33.8                                                            | S4        |
| CsPbBr <sub>3</sub> /BZNW/MRG<br>O                                | 150 mW cm <sup>-2</sup><br>>420 nm        | H <sub>2</sub> O Vapor | CO, CH <sub>4</sub>                  | 52.0                                                            | S5        |
| Fe: CsPbBr <sub>3</sub>                                           | 150 mW cm <sup>-2</sup>                   | H <sub>2</sub> O Vapor | CO, CH <sub>4</sub>                  | 55.0                                                            | S6        |
| CsPbBr <sub>3</sub> @GDY-Co                                       | 100 mW cm <sup>-2</sup><br>>400 nm        | Acetonitrile/water     | CO                                   | 55.4                                                            | S7        |
| CsPbBr <sub>3</sub> /Cs <sub>4</sub> PbBr <sub>6</sub>            | 100 mW cm <sup>-2</sup><br>>400 nm        | Deionized water        | CO, CH <sub>4</sub>                  | 24.7                                                            | S8        |
| CsPbBr <sub>3</sub> NCs (glycine)                                 | 100 mW/cm <sup>-2</sup><br>>400 nm        | H <sub>2</sub> O Vapor | CO                                   | 55.4                                                            | S9        |
| TiO <sub>2</sub> /CsPbBr <sub>3</sub>                             | 300 W Xe lamp                             | Acetonitrile/water     | CO, H <sub>2</sub>                   | 9.02                                                            | S10       |
| P-CN/CsPbBr <sub>3</sub>                                          | 300 W Xe lamp                             | Deionized water        | CO                                   | 12.16                                                           | S11       |

## References

- S1 Z. C. Kong, J. F. Liao, Y. J. Dong, Y. F. Xu, H. Y. Chen, D. Bin Kuang and C. Y. Su, *ACS Energy Lett.*, 2018, **3**, 2656–2662.
- S2 Y. Jiang, J. F. Liao, H. Y. Chen, H. H. Zhang, J. Y. Li, X. D. Wang and D. Bin Kuang, *Chem*, 2020, **6**, 766–780.
- S3 J. Hu, M. Yang, X. Ke, S. Yang, K. Wang, H. Huang, W. Wang, D. Luo, Z. Zheng, L. Huang, P. Xiao, C. Tu, Y. Min, N. Huo and M. Zhang, *J. Power Sources*, 2021, **481**, 1–6.
- S4 Y. F. Xu, M. Z. Yang, H. Y. Chen, J. F. Liao, X. D. Wang and D. Bin Kuang, *ACS Appl. Energy Mater.*, 2018, **1**, 5083–5089.
- S5 Y. Jiang, J. F. Liao, Y. F. Xu, H. Y. Chen, X. D. Wang and D. Bin Kuang, *J. Mater. Chem. A*, 2019, **7**, 13762–13769.
- S6 S. Shyamal, S. K. Dutta and N. Pradhan, *J. Phys. Chem. Lett.*, 2019, **10**, 7965–7969.
- S7 K. Su, G. X. Dong, W. Zhang, Z. L. Liu, M. Zhang and T. B. Lu, *ACS Appl. Mater. Interfaces*, 2020, **12**, 50464–50471.
- S8 Y. F. Mu, W. Zhang, X. X. Guo, G. X. Dong, M. Zhang and T. B. Lu, *ChemSusChem*, 2019, **12**, 4769–4774.
- S9 Y. Xu, W. Zhang, K. Su, Y. X. Feng, Y. F. Mu, M. Zhang and T. B. Lu, *Chem. Eur. J.*, 2021, **27**, 2305–2309.
- S10 F. Xu, K. Meng, B. Cheng, S. Wang, J. Xu and J. Yu, *Nat. Commun.*, 2020, **11**, 4613.
- S11 Y. Wang, Z. Liu, X. Tang, P. Huo, Z. Zhu, B. Yang and Z. Liu, *New J. Chem.*, 2021, **45**, 1082–1091.
